# Supplementary material
Source: PubMed Central journal article supplement (PMC556238)

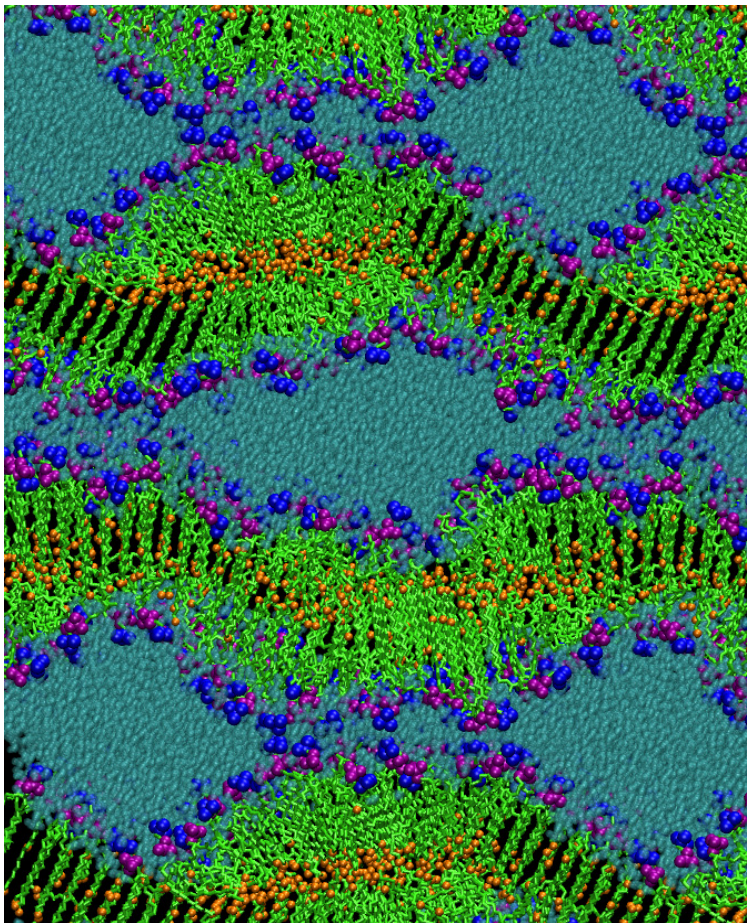

Supplement: pnas_102_15_5392__1.pdf [file pnas_102_15_5392__1.pdf]

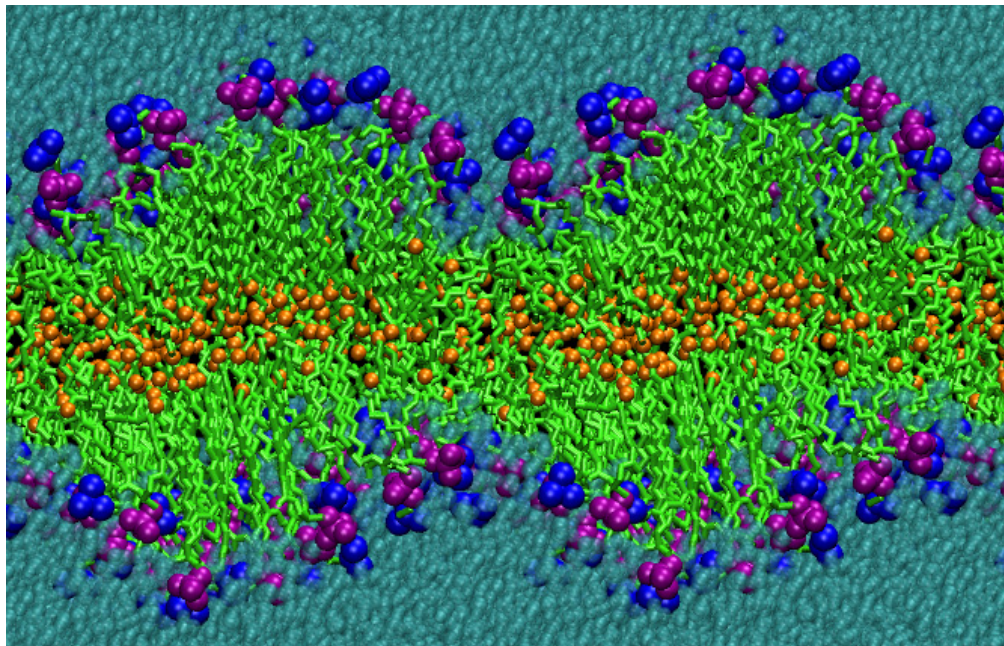

Supplement: pnas_102_15_5392__2.pdf [file pnas_102_15_5392__2.pdf]

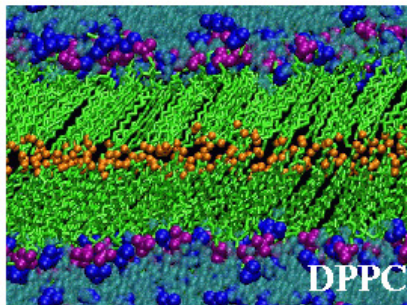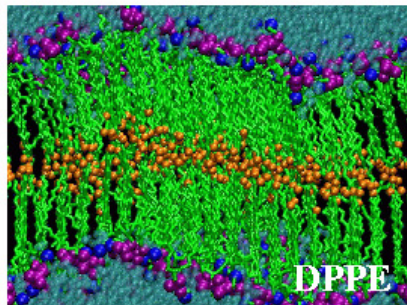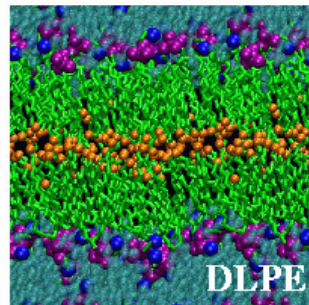

Supplement: pnas_102_15_5392__3.pdf [file pnas_102_15_5392__3.pdf]

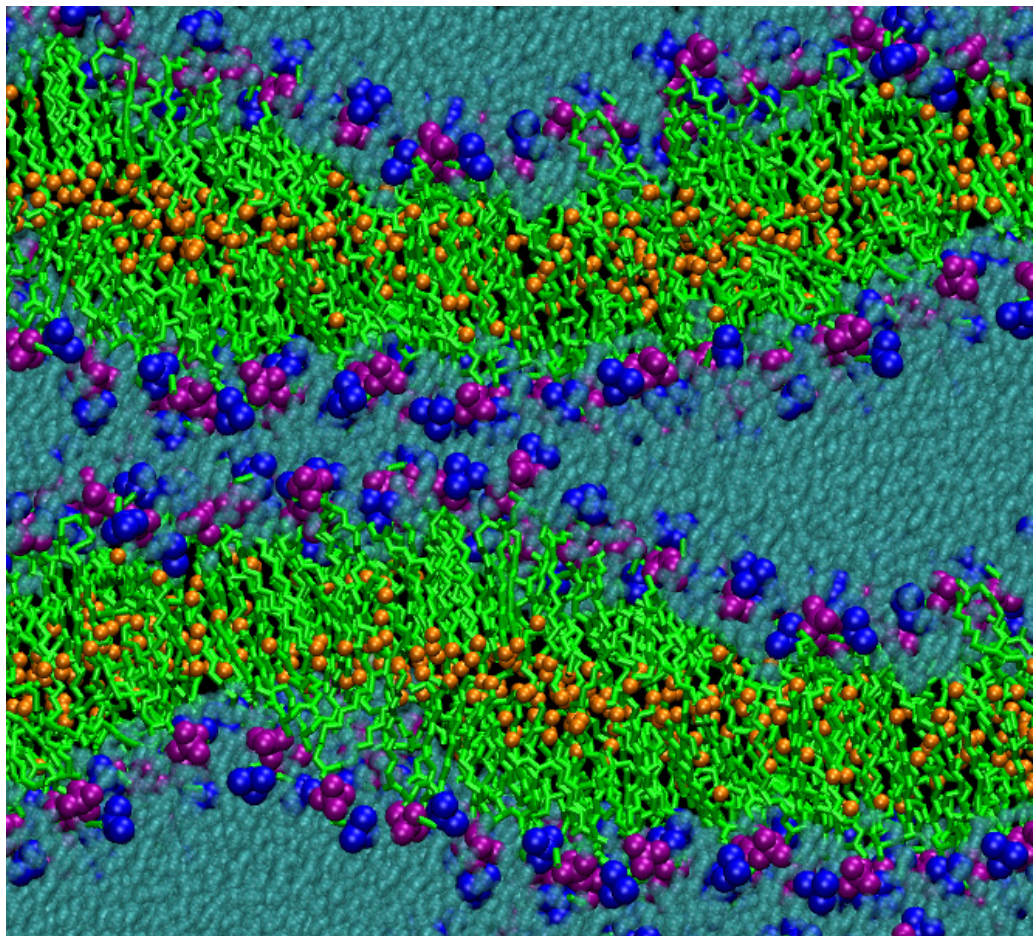

Supplement: pnas_102_15_5392__4.pdf [file pnas_102_15_5392__4.pdf]
